# Supplementary material for: From in silico and machine learning model to validation: discovery of novel amide-functionalized imidazopyridines as PIM-1 kinase inhibitors using an integrated ligand and structure-based hopping approach
Source: Royal Society of Chemistry journal article supplement (doi:10.1039/d6ra00514d), 2026-04-20
Supplement: d6ra00514d1.pdf [file d6ra00514d1.pdf]

### Characterization data of 6a-r

**N-(3-(imidazo[1,2-*a*]pyridin-2-yl)phenyl)benzamide (6a):** Nature and colour: Off-white crystalline solid; FT-IR (cm<sup>-1</sup>) (KBr) 3355 (Amide NH stretch), 3055 (Aromatic -CH stretch), 1665 (Amide -C=O stretch), 1653, 1600 (Imine -C=N stretch), 1556 (-CH bending), 1541, 1484, 699; <sup>1</sup>H NMR (500 MHz, DMSO) δ 10.58 (s, 1H, D<sub>2</sub>O exchangeable, Amide NH), 8.90 (d, *J* = 6.7 Hz, 1H, ArH), 8.77 (s, 1H, ArH), 8.56 (s, 1H, ArH), 8.03 (d, *J* = 7.2 Hz, 2H, ArH), 7.97 – 7.89 (m, 2H, ArH), 7.79 (t, *J* = 9.6 Hz, 2H, ArH), 7.63 (dd, *J* = 13.3, 6.0 Hz, 1H, ArH), 7.60 – 7.55 (m, 3H, ArH), 7.48 (t, *J* = 6.6 Hz, 1H, ArH); <sup>13</sup>C NMR (500 MHz, DMSO) δ 166.00 (Amide, -C=O), 145.27 (ArC=N), 144.78 (ArC), 140.10 (ArC), 135.37 (ArC), 134.80 (ArC), 132.06 (ArC), 129.42 (ArC), 128.86 (ArC), 128.15 (ArC), 127.41 (ArC), 125.45 (ArC), 121.43 (ArC), 120.15 (ArC), 118.14 (ArC), 117.09 (ArC), 112.73 (ArC), 109.60 (ArC); LC/MS Calculated C<sub>20</sub>H<sub>15</sub>N<sub>3</sub>O [M+1]<sup>+</sup>: m/z 313.36; observed, 314.00.

**4-Fluoro-N-(3-(imidazo[1,2-*a*]pyridin-2-yl)phenyl)benzamide (6b):** Nature and colour: Off-white crystalline solid; FT-IR (cm<sup>-1</sup>) (KBr) 3351 (Amide NH stretch), 3069 (Aromatic -CH stretch), 1658 (Amide -C=O stretch), 1604 (Imine -C=N stretch), 1559 (-CH bending), 755 (-CF stretch); <sup>1</sup>H NMR (500 MHz, DMSO) δ 10.63 (s, 1H, Amide NH), 8.89 (d, *J* = 6.7 Hz, 1H, ArH), 8.75 (s, 1H, ArH), 8.54 (t, *J* = 1.7 Hz, 1H, ArH), 8.13 (dd, *J* = 8.8, 5.5 Hz, 2H, ArH), 7.95 (d, *J* = 9.0 Hz, 1H, ArH), 7.91 – 7.85 (m, 1H, ArH), 7.83 – 7.77 (m, 2H, ArH), 7.58 (t, *J* = 7.9 Hz, 1H, ArH), 7.46 – 7.37 (m, 3H, ArH); <sup>13</sup>C NMR (500 MHz, DMSO) δ 166.82 (-CF), 165.09 (Amide, -C=O), 140.37 (ArC=N), 132.61 (ArC), 132.53 (ArC), 131.52 (ArC), 131.03 (ArC), 130.96 (ArC), 130.09 (ArC), 128.88 (ArC), 121.97 (ArC), 118.45 (ArC), 116.18 (ArC), 115.96 (ArC), 114.06 (ArC), 111.03 (ArC); LC/MS Calculated C<sub>20</sub>H<sub>14</sub>FN<sub>3</sub>O [M+1]<sup>+</sup>: m/z 331.35, observed, 332.10.

**4-Chloro-N-(3-(imidazo[1,2-*a*]pyridin-2-yl)phenyl)benzamide (6c):** Nature and colour: White crystalline solid; FT-IR (cm<sup>-1</sup>) (KBr); 3353 (Amide NH stretch), 3069 (Aromatic -CH

stretch), 1661 (Amide -C=O stretch), 1599 (Imine -C=N stretch), 1550 (-CH bending), 750 (-CCl stretch); <sup>1</sup>H NMR (500 MHz, DMSO) δ 10.42 (s, 1H, Amide NH), 8.56 (dt, *J* = 6.8, 1.1 Hz, 1H, ArH), 8.47 (s, 1H, ArH), 8.38 (s, 1H, ArH), 8.05 (d, *J* = 8.6 Hz, 2H, ArH), 7.77 (dd, *J* = 8.5, 1.6 Hz, 1H, ArH), 7.72 – 7.68 (m, 1H, ArH), 7.64 (d, *J* = 8.6 Hz, 2H, ArH), 7.59 (d, *J* = 9.1 Hz, 1H, ArH), 7.43 (t, *J* = 7.9 Hz, 1H, ArH), 7.26 (ddd, *J* = 9.0, 6.7, 1.2 Hz, 1H, ArH), 6.91 (td, *J* = 6.7, 1.1 Hz, 1H, ArH); <sup>13</sup>C NMR (500 MHz, DMSO) δ 164.89 (Amide, -C=O), 145.28 (ArC=N), 144.73, 139.91 (-CCl), 136.92 (ArC), 134.85 (ArC), 134.06 (ArC), 130.13 (ArC), 129.47 (ArC), 128.95 (ArC), 127.42 (ArC), 125.48 (ArC), 121.59 (ArC), 120.18 (ArC), 118.18 (ArC), 117.10 (ArC), 112.75 (ArC), 109.63 (ArC); LC/MS Calculated C<sub>20</sub>H<sub>14</sub>ClN<sub>3</sub>O [M+1]<sup>+</sup>: m/z 347.80, observed, 348.00.

**4-Bromo-N-(3-(imidazo[1,2-*a*]pyridin-2-yl)phenyl)benzamide (6d):** Nature and colour: Off-white crystalline solid; FT-IR (cm<sup>-1</sup>) (KBr) 3376 (Amide NH stretch), 3134 (Aromatic -CH stretch), 1656 (Amide -C=O stretch), 1614 (Imine -C=N stretch), 1558 (-CH bending), 739 (-CBr stretch); <sup>1</sup>H NMR (500 MHz, DMSO) δ 10.60 (s, 1H, Amide NH), 8.81 (d, *J* = 6.7 Hz, 1H, ArH), 8.67 (s, 1H, ArH), 8.52 (t, *J* = 1.8 Hz, 1H, ArH), 8.01 – 7.94 (m, 2H, ArH), 7.86 (d, *J* = 9.0 Hz, 1H, ArH), 7.82 – 7.71 (m, 5H, ArH), 7.55 (t, *J* = 7.9 Hz, 1H, ArH), 7.33 (t, *J* = 6.5 Hz, 1H, ArH); <sup>13</sup>C NMR (500 MHz, DMSO) δ 165.12 (Amide, -C=O), 143.89 (ArC=N), 140.06 (ArC), 134.29 (ArC), 131.91 (ArC), 130.34 (ArC), 129.74 (ArC), 128.08 (ArC), 125.95 (-CBr), 121.81 (ArC), 118.32 (ArC), 115.71 (ArC), 114.28 (ArC), 110.29 (ArC); LC/MS Calculated C<sub>20</sub>H<sub>14</sub>BrN<sub>3</sub>O [M+1]<sup>+</sup>: m/z 392.26, observed, 393.90;

**N-(3-(imidazo[1,2-*a*]pyridin-2-yl)phenyl)-4-(trifluoromethyl)benzamide (6e):** Nature and colour: White crystalline solid; FT-IR (cm<sup>-1</sup>) (KBr); 3269 (Amide NH stretch), 3061 (Aromatic -CH stretch), 1666 (Amide -C=O stretch), 1615 (Imine -C=N stretch), 1557 (-CH bending), 750; <sup>1</sup>H NMR (500 MHz, DMSO) δ 10.57 (s, 1H, Amide NH), 8.57 (d, *J* = 6.8 Hz, 1H, ArH), 8.48 (s, 1H, ArH), 8.40 (s, 1H, ArH), 8.21 (d, *J* = 8.1 Hz, 2H, ArH), 7.94 (d, *J* = 8.2 Hz, 2H,

ArH), 7.77 (dd,  $J = 8.1, 1.2$  Hz, 1H, ArH), 7.71 (d,  $J = 7.9$  Hz, 1H, ArH), 7.59 (d,  $J = 9.1$  Hz, 1H, ArH), 7.45 (t,  $J = 7.9$  Hz, 1H, ArH), 7.27 (ddd,  $J = 9.0, 6.7, 1.1$  Hz, 1H, ArH), 6.92 (td,  $J = 6.8, 1.0$  Hz, 1H, ArH);  $^{13}\text{C}$  NMR (500 MHz, DMSO)  $\delta$  164.86 (Amide, -C=O), 145.23 (ArC=N), 144.55 (ArC), 139.77 (ArC), 134.79 (ArC), 131.99 (ArC), 129.54 (ArC), 127.45 (ArC), 125.89 (-CF<sub>3</sub>), 121.79 (ArC), 120.26 (ArC), 118.22 (ArC), 117.04 (ArC), 112.83 (ArC), 109.69 (ArC); LC/MS Calculated C<sub>21</sub>H<sub>14</sub>F<sub>3</sub>N<sub>3</sub>O [M+1]<sup>+</sup>: m/z 381.36, observed, 382.10.

**N-(3-(imidazo[1,2-*a*]pyridin-2-yl)phenyl)-4-methylbenzamide (6f)**: Nature and colour: Off-white crystalline solid; FT-IR (cm<sup>-1</sup>) (KBr); 3268 (Amide NH stretch), 3066 (Aromatic -CH stretch), 2985 (Aliphatic CH stretch), 1669 (Amide -C=O stretch), 1618 (Imine -C=N stretch), 1559 (-CH bending), 756;  $^1\text{H}$  NMR (500 MHz, DMSO)  $\delta$  10.26 (s, 1H, Amide NH), 8.56 (d,  $J = 8.8$  Hz, 1H, ArH), 8.48 (s, 1H, ArH), 8.38 (s, 1H, ArH), 7.94 (d,  $J = 8.2$  Hz, 2H, ArH), 7.80 – 7.76 (m, 1H, ArH), 7.70 – 7.67 (m, 1H, ArH), 7.59 (d,  $J = 9.1$  Hz, 1H, ArH), 7.42 (t,  $J = 7.9$  Hz, 1H, ArH), 7.36 (d,  $J = 7.9$  Hz, 2H, ArH), 7.26 (ddd,  $J = 9.0, 6.7, 1.2$  Hz, 1H, ArH), 6.91 (t,  $J = 7.3$  Hz, 1H, ArH), 2.41 (s, 3H, CH<sub>3</sub>);  $^{13}\text{C}$  NMR (500 MHz, DMSO)  $\delta$  166.39 (Amide, -C=O), 140.91 (ArC=N), 138.23 (ArCCH<sub>3</sub>), 135.01 (ArC), 132.85 (ArC), 130.23 (ArC), 129.51 (ArC), 128.83 (ArC), 125.43 (ArC), 122.84 (ArC), 118.53 (ArC), 117.55 (ArC), 112.68 (ArC), 111.52 (ArC), 21.46 (CH<sub>3</sub>); LC/MS Calculated C<sub>21</sub>H<sub>17</sub>N<sub>3</sub>O [M+1]<sup>+</sup>: m/z 327.39, observed, 328.10.

**N-(3-(imidazo[1,2-*a*]pyridin-2-yl)phenyl)-4-methoxybenzamide (6g)**: Nature and colour: Off-white crystalline solid; FT-IR (cm<sup>-1</sup>) (KBr); 3270 (Amide NH stretch), 3069 (Aromatic -CH stretch), 2965 (Aliphatic CH stretch), 1664 (Amide -C=O stretch), 1619 (Imine -C=N stretch), 1600 (-CH bending), 759;  $^1\text{H}$  NMR (500 MHz, DMSO)  $\delta$  10.44 (s, 1H, Amide NH), 8.92 (d,  $J = 6.7$  Hz, 1H, ArH), 8.78 (s, 1H, ArH), 8.56 (s, 1H, ArH), 8.05 (d,  $J = 8.9$  Hz, 2H, ArH), 7.94 (dt,  $J = 19.1, 6.1$  Hz, 2H, ArH), 7.82 – 7.76 (m, 2H, ArH), 7.58 (t,  $J = 7.9$  Hz, 1H, ArH), 7.50 (t,  $J = 7.2$  Hz, 1H, ArH), 7.10 (d,  $J = 8.9$  Hz, 2H, ArH), 3.86 (s, 3H, OCH<sub>3</sub>);  $^{13}\text{C}$

NMR (500 MHz, DMSO)  $\delta$  165.63 (Amide, -C=O), 162.25 (ArCOCH<sub>3</sub>), 140.80 (ArC=N), 136.42 (ArC), 133.47 (ArC), 130.22 (ArC), 129.48 (ArC), 127.01 (ArC), 122.76 (ArC), 121.85 (ArC), 118.49 (ArC), 117.48 (ArC), 114.16 (ArC), 112.81 (ArC), 111.56 (ArC), 55.96 (OCH<sub>3</sub>); LC/MS Calculated C<sub>21</sub>H<sub>17</sub>N<sub>3</sub>O<sub>2</sub> [M+1]<sup>+</sup>: m/z 343.39, observed 344.10.

**N-(3-(imidazo[1,2-*a*]pyridin-2-yl)phenyl)-4-nitrobenzamide (6h)**: Nature and colour: Bright yellow crystalline solid; FT-IR (cm<sup>-1</sup>) (KBr); 3313 (Amide NH stretch), 3076 (Aromatic -CH stretch), 1645 (Amide -C=O stretch), 1602 (Imine -C=N stretch), 1515 (Nitro -NO<sub>2</sub> symmetric stretch), 1346 (Nitro -NO<sub>2</sub> asymmetric stretch), 764; <sup>1</sup>H NMR (500 MHz, DMSO)  $\delta$  10.67 (s, 1H, Amide NH), 8.56 (d, *J* = 6.8 Hz, 1H, ArH), 8.48 (s, 1H, ArH), 8.42 – 8.37 (m, 3H, ArH), 8.28 – 8.22 (m, 2H, ArH), 7.78 (dd, *J* = 8.0, 1.2 Hz, 1H, ArH), 7.74 – 7.70 (m, 1H, ArH), 7.59 (d, *J* = 9.6 Hz, 1H, ArH), 7.45 (t, *J* = 7.9 Hz, 1H, ArH), 7.27 (ddd, *J* = 9.0, 6.7, 1.2 Hz, 1H, ArH), 6.92 (td, *J* = 6.7, 1.1 Hz, 1H, ArH); <sup>13</sup>C NMR (500 MHz, DMSO)  $\delta$  164.26 (Amide, -C=O), 149.66 (ArCNO<sub>2</sub>), 145.30 (ArC=N), 144.50 (ArC), 141.02 (ArC), 139.66 (ArC), 136.86 (ArC), 134.85 (ArC), 131.17 (ArC), 129.72 (ArC), 127.45 (ArC), 125.60 (ArC), 124.21 (ArC), 121.92 (ArC), 120.24 (ArC), 118.23 (ArC), 117.06 (ArC), 112.82 (ArC), 109.70 (ArC); LC/MS Calculated C<sub>20</sub>H<sub>14</sub>N<sub>4</sub>O<sub>3</sub> [M+1]<sup>+</sup>: m/z 358.36, observed, 359.10.

**3-Fluoro-N-(3-(imidazo[1,2-*a*]pyridin-2-yl)phenyl)benzamide (6i)**: Nature and colour: Off-white crystalline solid; FT-IR (cm<sup>-1</sup>) (KBr); 3372 (Amide NH stretch), 3074 (Aromatic -CH stretch), 1667 (Amide -C=O stretch), 1618 (Imine -C=N stretch), 1591 (-CH bending), 750 (-CF stretch); <sup>1</sup>H NMR (500 MHz, DMSO)  $\delta$  10.64 (s, 1H, Amide NH), 8.88 (d, *J* = 6.7 Hz, 1H, ArH), 8.75 (s, 1H, ArH), 8.54 (s, 1H, ArH), 7.96 – 7.83 (m, 4H, ArH), 7.78 (dd, *J* = 9.2, 8.1 Hz, 2H, ArH), 7.62 (dt, *J* = 21.6, 8.0 Hz, 2H, ArH), 7.52 – 7.42 (m, 2H, ArH); <sup>13</sup>C NMR (500 MHz, DMSO)  $\delta$  163.38 (Amide, -C=O), 161.44 (-CF), 140.90 (ArC=N), 140.31 (ArC), 137.28 (ArC), 136.17 (ArC), 133.50 (ArC), 131.16 (ArC), 130.26 (ArC), 129.49 (ArC), 127.63 (ArC),

124.53 (ArC), 122.94 (ArC), 118.65 (ArC), 117.94 (ArC), 115.20 (ArC), 112.74 (ArC), 111.59 (ArC); LC/MS Calculated C<sub>20</sub>H<sub>14</sub>FN<sub>3</sub>O [M+1]<sup>+</sup>: m/z 331.35, observed 332.10.

**3-Chloro-N-(3-(imidazo[1,2-*a*]pyridin-2-yl)phenyl)benzamide (6j):** Nature and colour: Off-white crystalline solid; FT-IR (cm<sup>-1</sup>) (KBr); 3362 (Amide NH stretch), 3075 (Aromatic -CH stretch), 1666 (Amide -C=O stretch), 1617 (Imine -C=N stretch), 1596 (-CH bending), 746 (-CCl stretch); <sup>1</sup>H NMR (500 MHz, DMSO) δ 10.69 (s, 1H, Amide NH), 8.90 (d, *J* = 6.7 Hz, 1H, ArH), 8.77 (s, 1H, ArH), 8.53 (s, 1H, ArH), 8.08 (t, *J* = 1.8 Hz, 1H, ArH), 8.02 – 7.98 (m, 1H, ArH), 7.95 (d, *J* = 8.9 Hz, 1H, ArH), 7.93 – 7.88 (m, 1H, ArH), 7.79 (dd, *J* = 7.9 Hz, 2H, ArH), 7.71 (ddd, *J* = 8.0 Hz, 1H, ArH), 7.61 (td, *J* = 7.9, 4.3 Hz, 2H, ArH), 7.47 (t, *J* = 6.6 Hz, 1H, ArH); <sup>13</sup>C NMR (500 MHz, DMSO) δ 164.80 (Amide, -C=O), 140.96 (ArC=N), 140.30 (ArC), 136.94 (ArC), 133.74 (ArCCl), 132.11 (ArC), 130.95 (ArC), 129.50 (ArC), 128.01 (ArC), 127.11 (ArC), 122.94 (ArC), 122.37 (ArC), 118.64 (ArC), 117.52 (ArC), 112.74 (ArC), 111.61 (ArC); LC/MS Calculated C<sub>20</sub>H<sub>14</sub>ClN<sub>3</sub>O [M+1]<sup>+</sup>: m/z 347.80; observed, 346.99 (deconvoluted).

**3-Bromo-N-(3-(imidazo[1,2-*a*]pyridin-2-yl)phenyl)benzamide (6k):** Nature and colour: Off-white crystalline solid; FT-IR (cm<sup>-1</sup>) (KBr) 3258 (Amide NH stretch), 3125 (Heteroaromatic -CH stretch), 3038 (Aromatic -CH stretch), 1640 (Amide -C=O stretch), 1613 (Imine -C=N stretch), 1554 (-CH bending); <sup>1</sup>H NMR (500 MHz, DMSO) δ 10.49 (s, 1H, Amide NH), 8.62 (d, *J* = 6.7 Hz, 1H, ArH), 8.46 (d, *J* = 10.2 Hz, 2H, ArH), 8.22 (t, *J* = 1.8 Hz, 1H, ArH), 8.05 – 7.98 (m, 1H, ArH), 7.82 (ddd, *J* = 8.0, 1.8, 0.8 Hz, 1H, ArH), 7.78 (dd, *J* = 8.1, 1.2 Hz, 1H, ArH), 7.71 (d, *J* = 7.8 Hz, 1H, ArH), 7.65 (d, *J* = 9.0 Hz, 1H, ArH), 7.53 (t, *J* = 7.9 Hz, 1H, ArH), 7.46 (t, *J* = 7.9 Hz, 1H, ArH), 7.41 – 7.36 (m, 1H, ArH), 7.02 (t, *J* = 6.7 Hz, 1H, ArH); <sup>13</sup>C NMR (500 MHz, DMSO) δ 164.47 (Amide, -C=O), 144.52 (ArC=N), 139.92 (ArC), 137.84 (ArC), 134.84 (ArC), 131.15 (-CBr), 130.77 (ArC), 129.63 (ArC), 127.79

(ArC), 122.19 (ArC), 121.78 (ArC), 120.65 (ArC), 118.26 (ArC), 116.33 (ArC), 113.59 (ArC), 110.01 (ArC); LC/MS Calculated C<sub>20</sub>H<sub>14</sub>BrN<sub>3</sub>O [M+1]<sup>+</sup>: m/z 392.26, observed, 392.00.

**N-(3-(imidazo[1,2-a]pyridin-2-yl)phenyl)-3-(trifluoromethyl)benzamide (6l)**: Nature and colour: White crystalline solid; FT-IR (cm<sup>-1</sup>) (KBr); 3267 (Amide NH stretch), 3064 (Aromatic -CH stretch), 1667 (Amide -C=O stretch), 1614 (Imine -C=N stretch), 1537 (-CH bending), 773 (-CF stretch); <sup>1</sup>H NMR (500 MHz, DMSO) δ 10.57 (s, 1H, Amide NH), 8.56 (d, *J* = 7.9 Hz, 1H, ArH), 8.46 (s, 1H, ArH), 8.38 (d, *J* = 10.2 Hz, 2H, ArH), 8.32 (d, *J* = 7.8 Hz, 1H, ArH), 7.99 (d, *J* = 7.8 Hz, 1H, ArH), 7.81 (t, *J* = 7.8 Hz, 2H, ArH), 7.71 (d, *J* = 7.9 Hz, 1H, ArH), 7.58 (d, *J* = 9.7 Hz, 1H, ArH), 7.45 (t, *J* = 7.9 Hz, 1H, ArH), 7.27 (dd, *J* = 6.7, 1.2 Hz, 1H, ArH), 6.91 (td, *J* = 6.7, 1.1 Hz, 1H, ArH); <sup>13</sup>C NMR (500 MHz, DMSO) δ 164.47 (Amide, -C=O), 145.29 (ArC=N), 144.66 (ArC), 139.76 (ArC), 136.19 (ArC), 134.89 (ArC), 132.38 (ArC), 130.22 (ArCCF<sub>3</sub>), 129.79 (ArC), 127.43 (ArC), 125.57 (ArC), 124.73 (ArC), 123.40 (-CF), 121.75 (ArC), 120.24 (ArC), 118.28 (ArC), 117.09 (ArC), 112.77 (ArC), 109.66 (ArC); LC/MS Calculated C<sub>20</sub>H<sub>14</sub>ClN<sub>3</sub>O [M+1]<sup>+</sup>: m/z 381.36; observed 381.09 (deconvoluted).

**N-(3-(imidazo[1,2-a]pyridin-2-yl)phenyl)-3-methylbenzamide (6m)**: Nature and colour: Off-white crystalline solid; FT-IR (cm<sup>-1</sup>) (KBr); 3375 (Amide NH stretch), 3050 (Aromatic -CH stretch), 2922 (Aliphatic CH stretch), 1667 (Amide -C=O stretch), 1618 (Imine -C=N stretch), 1591 (-CH bending), 742; <sup>1</sup>H NMR (500 MHz, DMSO) δ 10.55 (s, 1H, Amide NH), 8.92 (d, *J* = 6.7 Hz, 1H, ArH), 8.78 (s, 1H, ArH), 8.54 (d, *J* = 1.6 Hz, 1H, ArH), 7.99 – 7.90 (m, 2H, ArH), 7.85 (s, 1H, ArH), 7.84 – 7.77 (m, 3H, ArH), 7.59 (t, *J* = 7.9 Hz, 1H, ArH), 7.49 (dd, *J* = 11.6, 5.7 Hz, 1H, ArH), 7.45 (dd, *J* = 4.5, 2.0 Hz, 2H, ArH), 2.44 – 2.41 (m, 3H, ArH); <sup>13</sup>C NMR (500 MHz, DMSO) δ 166.39 (Amide, -C=O), 140.91 (ArC=N), 138.23 (ArCCH<sub>3</sub>), 135.01 (ArC), 132.85 (ArC), 130.23 (ArC), 129.51 (ArC), 128.83 (ArC), 125.43 (ArC), 122.84 (ArC), 118.53 (ArC), 117.55 (ArC), 112.68 (ArC), 111.52 (ArC), 21.46 (CH<sub>3</sub>); LC/MS Calculated C<sub>21</sub>H<sub>17</sub>N<sub>3</sub>O [M+1]<sup>+</sup>: m/z 327.39, observed, 328.10.

**N-(3-(imidazo[1,2-*a*]pyridin-2-yl)phenyl)-3-methoxybenzamide (6n):** Nature and colour: Off-white crystalline solid; FT-IR (cm<sup>-1</sup>) (KBr); 3319 (Amide NH stretch), 3074 (Aromatic -CH stretch), 2967 (Aliphatic CH stretch), 1666 (Amide -C=O stretch), 1617 (Imine -C=N stretch), 1586 (-CH bending), 743; <sup>1</sup>H NMR (500 MHz, DMSO) δ 10.59 (s, 1H, Amide NH), 8.92 (d, *J* = 6.7 Hz, 1H, ArH), 8.78 (s, 1H, ArH), 8.55 (s, 1H, ArH), 7.97 (d, *J* = 8.9 Hz, 1H, ArH), 7.95 – 7.90 (m, 1H, ArH), 7.81 (t, *J* = 6.9 Hz, 2H, ArH), 7.65 – 7.60 (m, 1H, ArH), 7.58 (dd, *J* = 5.0, 2.7 Hz, 2H, ArH), 7.52 – 7.45 (m, 2H, ArH), 7.20 (dd, *J* = 8.1, 2.3 Hz, 1H, ArH), 3.87 (s, 3H, OCH<sub>3</sub>); <sup>13</sup>C NMR (500 MHz, DMSO) δ 165.98 (Amide, -C=O), 159.68 (ArCOCH<sub>3</sub>), 140.98 (ArC=N), 140.53 (ArC), 136.36 (ArC), 133.55 (ArC), 130.22 (ArC), 129.50 (ArC), 122.96 (ArC), 122.15 (ArC), 120.49 (ArC), 118.66 (ArC), 117.53 (ArC), 113.51 (ArC), 112.71 (ArC), 111.58 (ArC), 55.89 (OCH<sub>3</sub>); LC/MS Calculated C<sub>21</sub>H<sub>17</sub>N<sub>3</sub>O<sub>2</sub> [M+1]<sup>+</sup>: m/z 343.39, observed, 344.10.

**N-(3-(imidazo[1,2-*a*]pyridin-2-yl)phenyl)-3-nitrobenzamide (6o):** Light yellow crystalline solid; FT-IR (cm<sup>-1</sup>) (KBr); 3241 (Amide NH stretch), 3084 (Aromatic -CH stretch), 1668 (Amide -C=O stretch), 1615 (Imine -C=N stretch), 1552 (Nitro –NO<sub>2</sub> symmetric stretch), 1346 (Nitro –NO<sub>2</sub> asymmetric stretch), 752; <sup>1</sup>H NMR (500 MHz, DMSO) δ 10.73 (s, 1H, Amide NH), 8.87 (s, 1H, ArH), 8.61 (d, *J* = 6.8 Hz, 2H, ArH), 8.49-8.44 (m, 2H, ArH), 8.36 (d, *J* = 10.3 Hz, 1H, ArH), 7.87 (t, *J* = 8.0 Hz, 1H, ArH), 7.82 (t, *J* = 8.0 Hz, 1H, ArH), 7.73 (d, *J* = 7.8 Hz, 1H, ArH), 7.64 (d, *J* = 9.0 Hz, 1H, ArH), 7.48 (t, *J* = 7.9 Hz, 1H, ArH), 7.39 – 7.33 (m, 1H, ArH), 7.00 (t, *J* = 6.6 Hz, 1H, ArH); <sup>13</sup>C NMR (500 MHz, DMSO) δ 163.83 (Amide, -C=O), 148.25 (ArCNO<sub>2</sub>), 144.68 (ArC=N), 139.73 (ArC), 134.70 (ArC), 131.01 (ArC), 130.68 (ArC), 129.66 (ArC), 127.81 (ArC), 122.94 (ArC), 121.95 (ArC), 120.65 (ArC), 113.45 (ArC), 109.98 (ArC); LC/MS Calculated C<sub>20</sub>H<sub>14</sub>N<sub>4</sub>O<sub>3</sub> [M+1]<sup>+</sup>: m/z 358.36, observed, 359.00.

**2-Fluoro-N-(3-(imidazo[1,2-*a*]pyridin-2-yl)phenyl)benzamide (6p):** Nature and colour: Off-white crystalline solid; FT-IR (cm<sup>-1</sup>) (KBr); 3287 (Amide NH stretch), 3072 (Aromatic -CH stretch), 1656 (Amide -C=O stretch), 1612 (Imine -C=N stretch), 1591 (-CH bending), 745 (-CF stretch); <sup>1</sup>H NMR (500 MHz, DMSO) δ 10.70 (s, 1H, Amide NH), 8.87 (d, *J* = 6.7 Hz, 1H, ArH), 8.75 (s, 1H, ArH), 8.49 (s, 1H, ArH), 7.93 (d, *J* = 8.9 Hz, 1H, ArH), 7.86 (t, *J* = 7.8 Hz, 1H, ArH), 7.78 (d, *J* = 7.8 Hz, 1H, ArH), 7.75-7.67 (m, 2H, ArH), 7.65 -7.55 (m, 2H, ArH), 7.40 (ddd, *J* = 16.0, 10.9, 3.8 Hz, 3H, ArH); <sup>13</sup>C NMR (500 MHz, DMSO) δ 164.89 (-CF), 162.34 (Amide, -C=O), 145.28 (ArC=N), 144.75 (ArC), 140.01 (ArC), 134.82 (ArC), 131.80 (ArC), 130.94 (ArC), 129.45 (ArC), 127.41 (ArC), 125.48 (ArC), 121.50 (ArC), 120.18 (ArC), 118.17 (ArC), 117.09 (ArC), 115.90 (ArC), 112.74 (ArC), 109.62 (ArC); LC/MS Calculated C<sub>20</sub>H<sub>14</sub>FN<sub>3</sub>O [M+1]<sup>+</sup>: m/z 331.35; observed 330.89 (deconvoluted).

**N-(3-(imidazo[1,2-*a*]pyridin-2-yl)phenyl)-1-naphthamide (6q):** Nature and colour: Off-white crystalline solid; FT-IR (cm<sup>-1</sup>) (KBr); 3239 (Amide NH stretch), 3063 (Aromatic -CH stretch), 1651 (Amide -C=O stretch), 1615 (Imine -C=N stretch), 1593 (-CH bending), 740; <sup>1</sup>H NMR (500 MHz, DMSO) δ 10.67 (s, 1H, Amide NH), 8.57 (d, *J* = 7.0 Hz, 2H, ArH), 8.40 (s, 1H, ArH), 8.28 – 8.23 (m, 1H, ArH), 8.10 (d, *J* = 8.3 Hz, 1H, ArH), 8.05 (dd, *J* = 6.7, 2.7 Hz, 1H, ArH), 7.81 (dd, *J* = 6.9, 0.7 Hz, 1H, ArH), 7.73 (dd, *J* = 7.7, 1.2 Hz, 2H, ArH), 7.67 – 7.58 (m, 4H, ArH), 7.45 (t, *J* = 7.9 Hz, 1H, ArH), 7.26 (ddd, *J* = 9.1, 6.7, 1.2 Hz, 1H, ArH), 6.91 (td, *J* = 6.7, 1.1 Hz, 1H, ArH); <sup>13</sup>C NMR (500 MHz, DMSO) δ 167.85 (Amide, -C=O), 145.29 (ArC=N), 144.80 (ArC), 140.24 (ArC), 133.66 (ArC), 130.61 (ArC), 129.55 (ArC), 128.82 (ArC), 127.49 (ArC), 127.42 (ArC), 126.84 (ArC), 125.99 (ArC), 125.64 (ArC), 125.54 (ArC), 125.46 (ArC), 117.13 (ArC), 112.74 (ArC), 109.66 (ArC); LC/MS Calculated C<sub>24</sub>H<sub>17</sub>N<sub>3</sub>O [M+1]<sup>+</sup>: m/z 363.42; observed, 364.10.

**N-(3-(imidazo[1,2-*a*]pyridin-2-yl)phenyl)furan-2-carboxamide (6r):** Nature and colour: Dark brown crystalline solid; FT-IR (cm<sup>-1</sup>) (KBr); 3283 (Amide NH stretch), 3127

(heteroaromatic -CH stretch), 1650 (Amide -C=O stretch), 1613 (Imine -C=N stretch), 1579 (-CH bending), 751; <sup>1</sup>H NMR (500 MHz, DMSO) δ 10.26 (s, 1H, Amide NH), 8.56 (d, *J* = 8.9 Hz, 1H, ArH), 8.42 (s, 1H, ArH), 8.37 (s, 1H, ArH), 7.96 (dd, *J* = 1.6, 0.7 Hz, 1H, ArH), 7.75 (ddd, *J* = 8.1, 2.0, 0.8 Hz, 1H, ArH), 7.71-7.66 (m, 1H, ArH), 7.59 (d, *J* = 9.1 Hz, 1H, ArH), 7.41 (dd, *J* = 10.1, 5.7 Hz, 2H, ArH), 7.26 (ddd, *J* = 9.0, 6.7, 1.2 Hz, 1H, ArH), 6.91 (td, *J* = 6.7, 1.1 Hz, 1H, ArH), 6.73 (dd, *J* = 3.5, 1.7 Hz, 1H, ArH); <sup>13</sup>C NMR (500 MHz, DMSO) δ 156.76 (Amide, -C=O), 147.96 (ArC=N), 146.27 (ArC), 145.26 (ArC), 144.69 (ArC), 139.48 (ArC), 134.82 (ArC), 129.48 (ArC), 127.42 (ArC), 125.50 (ArC), 121.50 (ArC), 120.13 (ArC), 118.09 (ArC), 117.08 (ArC), 115.14 (ArC), 112.76 (ArC), 112.59 (ArC), 109.63 (ArC); LC/MS Calculated C<sub>18</sub>H<sub>13</sub>N<sub>3</sub>O<sub>2</sub> [M+1]<sup>+</sup>: m/z 303.32; observed, 304.10.

**Table S1:** Physical properties of imidazopyridine amides **6a-r**

| <b>Molecule Id</b> | <b>R</b>           | <b>Molecular weight</b> | <b>R<sub>f</sub></b> | <b>% Yield</b> |
|--------------------|--------------------|-------------------------|----------------------|----------------|
| <b>6a</b>          | -H                 | 313.36                  | 0.40                 | 80.29          |
| <b>6b</b>          | -4F                | 331.35                  | 0.41                 | 85.23          |
| <b>6c</b>          | -4Cl               | 347.80                  | 0.44                 | 89.56          |
| <b>6d</b>          | -4Br               | 392.26                  | 0.47                 | 88.64          |
| <b>6e</b>          | -4CF <sub>3</sub>  | 381.36                  | 0.39                 | 87.03          |
| <b>6f</b>          | -4CH <sub>3</sub>  | 327.39                  | 0.30                 | 78.11          |
| <b>6g</b>          | -4OCH <sub>3</sub> | 343.39                  | 0.29                 | 72.36          |
| <b>6h</b>          | -4NO <sub>2</sub>  | 358.36                  | 0.38                 | 76.25          |
| <b>6i</b>          | -3F                | 331.35                  | 0.39                 | 82.56          |
| <b>6j</b>          | -3Cl               | 347.80                  | 0.45                 | 88.44          |
| <b>6k</b>          | -3Br               | 392.26                  | 0.36                 | 78.66          |
| <b>6l</b>          | -3CF <sub>3</sub>  | 381.36                  | 0.34                 | 85.77          |
| <b>6m</b>          | -3CH <sub>3</sub>  | 327.39                  | 0.38                 | 75.96          |
| <b>6n</b>          | -3OCH <sub>3</sub> | 343.39                  | 0.31                 | 71.20          |
| <b>6o</b>          | -3NO <sub>2</sub>  | 358.36                  | 0.33                 | 86.55          |
| <b>6p</b>          | -2F                | 331.35                  | 0.42                 | 84.65          |
| <b>6q</b>          | 1-Napthyl          | 363.42                  | 0.45                 | 77.59          |
| <b>6r</b>          | 2-Furyl            | 303.32                  | 0.32                 | 69.98          |
